# Supplementary material for: Involvement of Estrogen and Its Receptors in Morphological Changes in the Eyes of the Japanese Eel, Anguilla japonica, in the Process of Artificially-Induced Maturation
Source: MDPI journal article supplement (doi:10.3390/cells8040310), 2019-04-03
Supplement: s1 [file s1]

1 **Table S1.** Gonadosomatic index (GSI), oocyte diameter (OD), eye index (EI) changes in the  
2 female Japanese eel after intraperitoneal injections of SPE.

|                                         | Stage1<br>(n=8)                         | Stage2<br>(n=13)                          | Stage3<br>(n=8)                            | Stage4<br>(n=6)                            | Stage5<br>(n=6)                             |
|-----------------------------------------|-----------------------------------------|-------------------------------------------|--------------------------------------------|--------------------------------------------|---------------------------------------------|
| <b>GSI</b><br>Range<br>(mean $\pm$ SEM) | <b>0.1 – 0.6</b><br>(0.18 $\pm$ 0.07)   | <b>1.4 – 3.0</b><br>(1.8 $\pm$ 0.1)       | <b>6.4 – 17.3</b><br>(12.1 $\pm$ 1.1)      | <b>16.3 – 45.2</b><br>(24.8 $\pm$ 2.0)     | <b>27.6 – 46.2</b><br>(40.7 $\pm$ 2.8)      |
| <b>OD</b><br>Range<br>(mean $\pm$ SEM)  | <b>65.7 – 92.5</b><br>(78.4 $\pm$ 3.6)  | <b>155.5 – 197.1</b><br>(174.6 $\pm$ 3.3) | <b>306.7 – 423.0</b><br>(357.5 $\pm$ 12.6) | <b>457.0 – 638.7</b><br>(522.0 $\pm$ 27.4) | <b>975.8 – 1078.6</b><br>(892.2 $\pm$ 83.3) |
| <b>EI</b><br>Range<br>(mean $\pm$ SEM)  | <b>2.41 – 3.98</b><br>(3.04 $\pm$ 0.21) | <b>3.16 – 4.89</b><br>(3.85 $\pm$ 0.15)   | <b>4.29 – 5.87</b><br>(4.99 $\pm$ 0.18)    | <b>4.02 – 5.10</b><br>(4.73 $\pm$ 0.16)    | <b>6.63 – 7.15</b><br>(6.21 $\pm$ 0.47)     |
